# Supplementary material
Source: PubMed Central journal article supplement (PMC1559814)
Supplement: rspb20053088s03.pdf [file rspb20053088s03.pdf]

# **ELECTRONIC APPENDIX**

This is the Electronic Appendix to the article  
Multiple sperm storage organs facilitate female control of paternity

by

Lindsay SE Snow and Maydianne CB Andrade

*Proc. R. Soc. B* (doi:10.1098/rspb.2005.3088)

Electronic appendices are refereed with the text; however, no attempt is made to impose a uniform editorial style on the electronic appendices.

**Appendix A: Multiple sperm storage organs facilitate female control of paternity**

**Table 1.** Comparison of mean egg sac traits in the normal, normal (NN) and irradiated, irradiated (RR) control treatments, and mating trial characteristics for normal and irradiated males across all treatments pooled (NN, RR, same-side, and opposite-side).

|                                    | treatments | normal           | irradiated        | Statistical result                       |
|------------------------------------|------------|------------------|-------------------|------------------------------------------|
| <b>number of eggs</b>              | NN, RR     | 186.6 ± 88.5     | 187.9 ± 97.4      | Pooled t = 0.029<br>df = 16, p = 0.978   |
| <b>copulatory failure rate†</b>    | All        | 24.4%<br>(21/86) | 27.5%<br>(30/109) | Pearson $\chi^2 = 0.204$ , p = 0.651     |
| <b>development rate‡</b>           | NN, RR     | 92.9%            | 0.02%             | N/A                                      |
| <b>precopulatory duration (hr)</b> | All        | 3.9 ± 1.8        | 4.0 ± 1.7         | Pooled t = 0.507<br>df = 231, p = 0.612  |
| <b>copulation duration (min)</b>   | All        | 15.6 ± 7.2       | 14.5 ± 8.0        | Pooled t = -1.115<br>df = 228, p = 0.266 |

†Male fails to insert palp before 8 hour trial elapses

‡Mean percent of eggs that develop per egg sac

**Table 2.** A comparison of the mean (SD) of male traits and mating characteristics in cannibalistic and non-cannibalistic first and second matings.

|                                  | first copulations        |                         | second copulations      |                         |
|----------------------------------|--------------------------|-------------------------|-------------------------|-------------------------|
|                                  | cannibalism              | no cannibalism          | cannibalism             | no cannibalism          |
| <b>copulation duration (min)</b> | 17.5 (7.0)<br>n = 37     | 13.5* (8.3)<br>n = 39   | 17.7 (7.5)<br>n = 35    | 12.7* (7.5)<br>n = 36   |
| <b>courtship duration (hrs)</b>  | 4.31 (1.62)<br>n = 37    | 3.99 (1.52)<br>n = 39   | 4.22 (1.87)<br>n = 36   | 3.82 (1.97)<br>n = 37   |
| <b>male condition</b>            | -0.157 (0.712)<br>n = 34 | 0.136 (0.711)<br>n = 39 | 0.072 (0.983)<br>n = 32 | 0.021 (0.889)<br>n = 35 |
| <b>male age (days)</b>           | 10.8 (3.4)<br>n = 37     | 9.5 (3.1)<br>n = 39     | 9.9 (3.0)<br>n = 36     | 9.4 (3.0)<br>n = 37     |
| <b>Male size (mm)</b>            | 2.73 (0.227)<br>n = 36   | 2.89* (0.284)<br>n = 36 | 2.95 (0.31)<br>n = 34   | 2.80* (0.20)<br>n = 36  |

\* $p < 0.05$  after Bonferonni correction.
